# Supplementary material for: The Protective Effects of Lactobacillus plantarum KLDS 1.0344 on LPS-Induced Mastitis In Vitro and In Vivo
Source: PubMed Central journal article supplement (PMC8630701; doi:10.3389/fimmu.2021.770822), 2021-11-09
Supplement: DataSheet_1.pdf [file DataSheet_1.pdf]

**Table S1** Primer sequences for reverse transcription PCR

| gene          | Primer direction | Size (bp) | Sequence (5'-3')             | (bp) |
|---------------|------------------|-----------|------------------------------|------|
| IL-1 $\beta$  | Forward          |           | ATGAAGAGCTGCATCCAACACCT<br>G | 110  |
|               | Reverse          |           | ACCGACACCACCTGCCTGAAG        |      |
| IL-6          | Forward          |           | GCCTTCACTCCATTTCGCTGTCTC     | 117  |
|               | Reverse          |           | AAGTAGTCTGCCTGGGGTGGTG       |      |
| TNF- $\alpha$ | Forward          |           | CTGGCGGAGGTGCTCTC            | 85   |
|               | Reverse          |           | GGAGGAAGGAGAAGAGGCTGAG<br>G  |      |
| ACTIN         | Forward          |           | ATGTGGAGCTGGCGGAGGAG         | 315  |
|               | Reverse          |           | CGAGGGCATTGGCATACGAGTC       |      |

(1) PlnC8A

ATGGATAAATTTGAAAAAATTAGTACATCTAACCTAGAAAAGATCTCTGGCGGTGAT  
AACAAACCAAGTTATGGAGCTCTTGGGGATATTATCTTGGCAAGAAAGCACGTTGGAA  
TAAAGCACCCATATGTTCAATTTTAG

(2) PlnC8IF

ATGAAAAACATTAATAAGTACACTGAACTAAATGATCAGAAGTTGCAATCTTTAATT  
CGGAAAAACAAAGACTATAAGCTTGATGTCCGGGGTTGCAAGCCCCCATGCTTTTACA  
AAATTATTAAGCACTTGGAGGCCATCATTAG

(3) PlnC

GTGTTTCCAATTTATTTATTAGAAGATAACGAGGCCCAAAGAGTAGAGTATATAAGT/  
ATAAAGAATATAATCATGATTAAGAATATGATATGCAGTTGGTGGTGGCGACAGGA  
TTTACAAGAGTTAATGAATAATGTTATGAATCTAAAGAAGGGCTGTTTTCTTGGAT  
GGAAATTGGGGAACAACTCAGGCCGGGTTGAATTTAGCAGATGAAATTCGGCAGCA  
GTTACCTTGTGCACAAATTGATTTTATTACAACCTCATGAAGAGTTATCTTTTTTGACAC  
GGAGCGGCGGATTGCACCGTTGGATTATATTTTGAAAGAACAAGGCCTTGATGATAT  
AGCAAAAAATAGTTAAGGATATTGATGCAACTCAAATCTCAAGACAGAACTG  
GCAGCATAAGGATATTTTAGGTTATAAAATCGGAACGCTCTTTTCAGTTCCTATTAA  
TGATGTTATTATGCTGAGCACTAATAAAGAACGACCGGGTAGTATTAGGCTGACTGC  
AAAATAAAGTGGCAGATTTTCCAGGTAATTTAAATAGTTTTGAAAATAAATACTCAC/  
TTTTTTAGGTGTGATAAAAGTTCATTGGTAAATATAGATTATGTTGATAGTTATGATT/  
AAAAAAAAGAGCTTACCATGATAGATAACATTAAGTGCAGTGTTCGTATAGAAACGII  
CGGGAGCTTAACAAAATATTGAAAAAGAAATAG

(4) PlnD

TTGTTTCCAATTTATTTATACGAGGATAATGCTGAGCAAAGAGATAATTATTGTAAGA  
GTCAATAATACAATTATGATTAATGAGTTTGCAATGGAGCTTAGGGTTGCAACGGATC  
CAAAAAATAATTCTAGCAGATTTGAATCAACAACAAGATGGCCTTTTCTTTTTGGATA  
GGAAATTGGTGAGGACAAACAGACTGGACTTGAATTAGCCAGTCGAATTCGGGCAAC  
GATACCATTGGCTAAAATAGTTTTTCATTACAACACACGATGAGCTATCGTTTGTAAC  
GGAACGGCGGATTGCACCGTTGGATTATATTTTGAAAGACCAGTCTGCTGACCTAAT  
CGCAAAGGATTATTAAGGACATCAATGTAGTACAGAACGAATTAATAAAGACTAAT/  
CAGCGC

AAAGATGTTTTTAACATAAAGTTAGGAACGCGATACTTTTCACTTCATTAGATGATGTC  
ATTTTGTGAGTACATCTAACTGCGTCCGGGCAGCGTACAACCTCCATGCTATTAATA  
GGTTGCTGAGTCCCAGGAAATTTAAATGCGCTCGAAGAAAAGTATCCGCAATTTTTCT  
GATGCGATAAGAGCTCGCTGGTAAATTTAAATCATTGCGAAGTTTTGACTATAAAG/  
AAAGAGTTGTTGCTCGACGGTGAAATTAGGTGTAAGGCTTCGTTTAGAAAGTCGCGG  
AATTGAA

(5) PlnE

ATGCTACAGTTTGAGAAGTTACAATATTCCAGGTTGCCGCAAAAAAGCTTGCCAAA  
TATCTGGTGGTTTTAATCGGGGCGGTTATAACTTTGGTAAAAGTGTTCGACATGTTGT  
ATGCAATTGGTTCAGTTGCAGGCATTCGTGGTATTTTGAAAAGTATTCGTAA

(6) PlnK

ATGAAAATTAATTAACCTGTTTTAAATGAATTTGAAGAATTAACCTGCTGACGCTGAA/  
GAATATTTCTGGTGGCCGTCGGAGTCGTAAAAATGGAATTGGATACGCTATTGGTTAT  
CGTTTGGCGCGGTTGAACGGGCCGTGCTTGGTGGTTCAAGGGATTATAATAAGTGA

**Figure S1** Key gene sequence related to bacteriocin synthesis of *Lactobacillus plantarum*
